# Supplementary material
Source: PubMed Central journal article supplement (PMC5193135)
Supplement: NIHMS748662-supplement-text.pdf [file NIHMS748662-supplement-text.pdf]

## Supplemental Appendix

### Study Protocol and Methods

#### *SWIFT Study Recruitment and Eligibility Criteria*

Study exams occurred at 7 medical centers and 6 medical offices throughout the 5,000 square-mile Kaiser Permanente Northern California Region. SWIFT Study activities were carried out in three areas: 1) North: Sacramento, South Sacramento, Roseville, Rancho Cordova, Elk Grove, Point West, and Folsom Medical facilities; 2) East: Division of Research (DOR) Research Clinic (Oakland), Hayward and Richmond Medical Center; and 3) South: Fremont, Santa Clara, and San Jose Medical Centers.

All study participants received prenatal care, and delivered at a Kaiser Permanente hospitals and met study eligibility criteria as follows: 1) Age 20 to 45 years at delivery, 2) Availability of clinical medical record and delivery record from the KPNC Health Connect electronic medical record, 3) GDM pregnancy diagnosed by Carpenter and Coustan's criteria, 4) Delivered a singleton, live birth  $\geq$  35 weeks gestation, 5) No pre-existing diabetes or other serious medical conditions prior to index GDM pregnancy, 6) No diabetes diagnosis at 6 to 9 weeks postpartum for the index GDM pregnancy, 7) No use of steroids, or other medications significantly affecting glucose tolerance, 8) Not planning to move from the northern California area within the subsequent two years, 9) Not planning another pregnancy within the next two years, and 10) English or Spanish speaking.

We also selected women for the study based on their infant feeding practices, intentions and status from delivery through 6-9 weeks postpartum to classify them into one of two groups: 1) *Intensive formula (Exclusive or Mostly Formula)*: Breastfed <3 weeks and fed

>17 oz. of formula per day; also includes inconsistent feeding pattern, or 2) *Intensive lactation* (Exclusive or Mostly Breast milk) defined as only breast milk only since birth, or >0 to 6 oz. of formula per day at 6-9 weeks postpartum with the intention to continue breastfeeding at this intensity for at least 4 months.

### **Infant Feeding Intensity Groups – Formula Intake by Infant Age:**

The lactation intensity groups represented average formula intake for infants that is <25% (mostly breastfeeding) or >70% (exclusive or mostly formula feeding) of the energy requirements for infants by age. The cut points for classification at 6-9 weeks postpartum assessments reflect 70% of average daily formula intake (>17 oz per day at 2 months, and >14 oz at 1 month of age) and no more than 25% ( $\leq 6$  oz per day) at age 2 months.

### **Physical Activity Assessment**

The Pregnancy Physical Activity Questionnaire (PPAQ), a 32-item semi-quantitative and validated questionnaire (reproducibility measures of 0.78 to 0.93 based on intraclass correlation coefficients estimating the proportion of the total variance explained by between-subject variance) was used to assess physical activity during the postpartum period.(20)

### **Statistical Methods and Analyses**

#### *Weibull Regression.*

The study is characterized by heavy interval censoring, with unequal intervals (though, the vast majority of assessments are near 12 months, and near 24 months postpartum), and with one of the primary covariates of interest being time-dependent (lactation duration). Semi-parametric methods for regression analysis under these circumstances have been proposed, but are

difficult to implement computationally and/or very high dimension with many nuisance parameters (Sparling, Younes, and Lachin, 2006). As an alternative, parametric models are robust for heavily interval censored data, and more informative **than** non-parametric approaches (Lindsey and Ryan, 1998). The Weibull regression is a commonly used parametric regression model, and allows for a wide range in distributional shapes (Lindsey and Ryan, 1998). It is an accelerated failure time model, and the only such model with regression parameters that can be interpreted as hazard ratios. (Hosmer, Lemeshow and May, 2008). In summary, we have chosen the Weibull regression approach due flexibility in capturing a wide range in hazard functions, and for practical reasons including the ability to accommodate right and interval censoring and time-dependent covariates and ease in interpretation of regression coefficients as hazard ratios. Estimation is via standard maximum likelihood. The only assumption regarding failure/censoring times is the standard assumption that censoring is non-informative. Our assumed Weibull model is a special case in a very broad 3-parameter family of regression models, with the Weibull model specified via one of the hazard function parameters fixed at 0 (“kappa” ). Departures from the Weibull model, including non-proportionality is assessed by a Wald test of  $\kappa = 0$ , (Sparling, Younes, and Lachin, 2006). We found no evidence of departure from model assumptions.

#### References:

Hosmer D, Lemeshow S, and May S. (2008). Applied Survival Analysis (2nd Edn.). Hoboken: Wiley Series in Probability and Statistics.

Lindsey JC, Ryan LM. Tutorial in biostatistics methods for interval-censored data. Stat Med. 1998 Jan 30;17(2):219-38. PMID:9483730

Sparling YH, Younes N, Lachin JM, Bautista OM. Parametric survival models for interval censored data with time-dependent covariates. Biostatistics 2006; 7(4):599-614.

### *Estimates of the Cumulative Incidence Proportion of Incident Diabetes*

To estimate the 2 year cumulative incidence proportion of incident diabetes for levels of lactation intensity at study baseline, we selected the following fixed values for the model covariables: maternal age = 35 years, race = Hispanic, Education <= high school, BMI = 30 kg/m<sup>2</sup>, GDM treatment = diet only, prenatal 3-hr 100 gram OGTT Z-score sum = 0.5, gestational age at GDM diagnosis = 25 weeks, and no subsequent births.

Adjusted 2 year cumulative incidence proportion of incident diabetes for levels of lactation intensity at study baseline:

|                                      |        |
|--------------------------------------|--------|
| Exclusive Formula feeding            | 25.4%, |
| Mostly Formula/Inconsistent or mixed | 17.5%, |
| Mostly Lactation                     | 14.8%, |
| Exclusive Lactation                  | 12.8%. |

### *Analysis of time dependent current lactation status*

We examined current lactation status as a time-dependent covariate to determine whether prolonged lactation and reduction in diabetes risk was related to active lactation (current) or cumulative lactation duration. We found that current lactation status was not associated with diabetes incidence (all p-values > 0.58). This finding makes sense given that the vast majority of diabetes events (95%) in our study occurred at or beyond 11 months post-baseline, and the majority of women (79%) were not lactating by 11 months post-baseline. We therefore observed very few incident diabetes cases in the time varying current lactation category.

**Supplemental Tables:**

**Table S1:** Newborn Characteristics of Infants Born to Women with GDM by Incident Diabetes Mellitus Status during the Two Years of Study Follow-up.

**Table S2:** Prenatal and Baseline Characteristics of Women with GDM by Lactation Intensity Groups at 6-9 weeks postpartum (Study baseline).

**Table S3:** Newborn Characteristics of Infants Born to Women with GDM by Lactation Intensity Groups at 6-9 weeks Postpartum (Study baseline).

**Table S4:** Distribution of 959 SWIFT Participants (n, %) among Lactation Intensity Groups at 6-9 weeks Postpartum and Lactation Duration Groups at the End of Follow-up, (P<0.001).

**Table S1:** Newborn Characteristics of Infants Born to Women with GDM by Incident Diabetes Mellitus Status during the Two Years of Study Follow-up.

| <b>Newborn</b> Characteristics          | Incident DM<br>n=113 | No DM<br>n=846 | P value      |
|-----------------------------------------|----------------------|----------------|--------------|
| Mean (SD), Birth weight (g)             | 3546 (576.9)         | 3390 (484.8)   | 0.002        |
| Mean (SD), Length (cm)                  | 51.0 (2.5)           | 50.5 (2.4)     | <b>0.026</b> |
| Mean (SD), Weight for length z-score    | -0.2 (1.5)           | -0.3 (1.4)     | 0.52         |
| Median (IQR), Weight for length z-score | -0.3 (1.8)           | -0.3 (1.8)     | 0.47         |
| Sex, N (%)                              |                      |                | 0.145        |
| Female                                  | 46 (40.7)            | 406 (48.0)     |              |
| Male                                    | 67 (59.3)            | 440 (52.0)     |              |
| Gestational age, N (%)                  |                      |                | 0.38         |
| 34 to <37 weeks (preterm)               | 7 (6.2)              | 37 (4.4)       |              |
| ≥ 37 weeks (term)                       | 106 (93.8)           | 809 (95.6)     |              |
| Birth Weight, N (%) †                   |                      |                | 0.21         |
| 1,500 – 2,499 g                         | 3 (2.7)              | 23 (2.7)       |              |
| 2,500 – 2,999 g                         | 17 (15.0)            | 159 (18.8)     |              |
| 3,000 – 3,999 g                         | 74 (65.5)            | 577 (68.2)     |              |
| 4,000 g or more                         | 19 (16.8)            | 87 (10.3)      |              |
| Size for gestational age, N (%) †       |                      |                | 0.013        |
| Small (SGA)                             | 1 (0.9)              | 18 (2.1)       |              |
| Appropriate (AGA)                       | 75 (66.4)            | 655 (77.4)     |              |
| Large (LGA)                             | 37 (32.7)            | 173 (20.5)     |              |
| Apgar score at 5 min, N (%) †           |                      |                | 0.26         |
| 6 or lower                              | 0 (0.0)              | 9 (1.1)        |              |
| 7 or higher                             | 110 (97.3)           | 826 (97.6)     |              |
| Missing                                 | 3 (2.7)              | 11 (1.3)       |              |
| Newborn Nursery, N (%)                  |                      |                | 0.47         |
| NICU                                    | 6 (5.3)              | 39 (4.6)       |              |
| Brief/Intermediate level                | 10 (8.9)             | 51 (6.0)       |              |
| Well care                               | 97 (85.8)            | 756 (89.4)     |              |
| Hospital stay, N (%)                    |                      |                | 0.149        |
| ≥ 3 days                                | 28 (24.8)            | 161 (19.0)     |              |
| < 3 days                                | 85 (75.2)            | 685 (81.0)     |              |

Chi-squared test for categorical variables; T-test or ANOVA for continuous variables. Kruskal-Wallis Test to compare medians. † Fisher exact test for cell sizes <5. Two-sided P values.

**Table S2:** Prenatal and Baseline Characteristics of Women with GDM by Lactation Intensity

Groups at 6-9 weeks postpartum (Study baseline).

| <b>Characteristics</b>                               | <b>Exclusive<br/>Formula<br/>n=153</b> | <b>Mostly<br/>Formula<br/>n=214</b> | <b>Mostly<br/>Lactation<br/>n=387</b> | <b>Exclusive<br/>Lactation<br/>n=205</b> |
|------------------------------------------------------|----------------------------------------|-------------------------------------|---------------------------------------|------------------------------------------|
| <b>Socio-demographics</b>                            |                                        |                                     |                                       |                                          |
| Mean (SD), Age at baseline (year)                    | 33.0 (4.9)                             | 33.4 (5.0)                          | 33.4 (4.8)                            | 33.5 (4.4)                               |
| Education, N (%) ***                                 |                                        |                                     |                                       |                                          |
| High school or less                                  | 60 (39.2)                              | 56 (26.2)                           | 79 (20.4)                             | 35 (17.1)                                |
| Some College                                         | 55 (36.0)                              | 55 (25.7)                           | 106 (27.4)                            | 54 (26.3)                                |
| College Graduate                                     | 38 (24.8)                              | 103 (48.1)                          | 202 (52.2)                            | 116 (56.6)                               |
| Race/ethnicity, N (%)‡ ***                           |                                        |                                     |                                       |                                          |
| Non-Hispanic White                                   | 34 (22.2)                              | 43 (20.1)                           | 79 (20.4)                             | 69 (33.6)                                |
| Non-Hispanic Black                                   | 22 (14.4)                              | 19 (8.9)                            | 20 (5.2)                              | 11 (5.4)                                 |
| Hispanic                                             | 48 (31.4)                              | 68 (31.8)                           | 118 (30.5)                            | 58 (28.3)                                |
| Asian                                                | 43 (28.1)                              | 80 (37.3)                           | 166 (42.9)                            | 63 (30.7)                                |
| Other                                                | 6 (3.9)                                | 4 (1.9)                             | 4 (1.0)                               | 4 (2.0)                                  |
| Parity, N (%)                                        |                                        |                                     |                                       |                                          |
| Primiparous                                          | 49 (32.0)                              | 93 (43.5)                           | 132 (34.1)                            | 72 (35.1)                                |
| Multiparous                                          | 104 (68.0)                             | 121 (56.5)                          | 255 (65.9)                            | 133 (64.9)                               |
| Polycystic Ovarian Syndrome (PCOS)                   | 10 (6.5)                               | 11 (5.1)                            | 31 (8.0)                              | 10 (4.9)                                 |
| WIC recipient, N (%)***                              | 59 (38.6)                              | 55 (25.7)                           | 87 (22.5)                             | 45 (22.0)                                |
| Family History of Diabetes, N (%)                    | 70 (45.8)                              | 103 (48.1)                          | 204 (52.7)                            | 96 (46.8)                                |
| <b>Prenatal characteristics</b>                      |                                        |                                     |                                       |                                          |
| Mean (SD), Pre-pregnancy BMI (kg/m <sup>2</sup> )*** | 31.2 (8.3)                             | 30.0 (7.8)                          | 29.3 (6.7)                            | 28.3 (6.1)                               |
| Pre-pregnancy weight status, N (%)*                  |                                        |                                     |                                       |                                          |
| BMI <25 kg/m <sup>2</sup>                            | 38 (24.8)                              | 66 (30.8)                           | 114 (29.5)                            | 73 (35.6)                                |
| 25 kg/m <sup>2</sup> ≤ BMI < 30 kg/m <sup>2</sup>    | 37 (24.2)                              | 60 (28.0)                           | 125 (32.3)                            | 65 (31.7)                                |
| BMI ≥ 30 kg/m <sup>2</sup>                           | 78 (51.0)                              | 88 (41.2)                           | 148 (38.2)                            | 67 (32.7)                                |
| Mean (SD), Gestational weight gain (kg)              | 10.8 (7.9)                             | 10.2 (6.5)                          | 10.2 (6.5)                            | 10.3 (6.9)                               |
| Mean (SD), 3-hr 100 g OGTT (mg/dL)                   |                                        |                                     |                                       |                                          |
| Fasting glucose                                      | 92.2 (11.4)                            | 93.4 (11.1)                         | 92.0 (12.6)                           | 90.4 (12.8)                              |
| 1 hour glucose                                       | 199.0 (22.1)                           | 201.3 (23.0)                        | 198.6 (23.2)                          | 199.1 (23.1)                             |
| 2 hour glucose                                       | 177.1 (25.0)                           | 176.3 (28.8)                        | 176.0 (29.2)                          | 176.7 (24.7)                             |
| 3 hour glucose                                       | 126.3 (34.7)                           | 128.5 (31.1)                        | 127.8 (33.3)                          | 122.7 (33.7)                             |
| Mean (SD), Sum 3-hr OGTT z-scores                    | 0.0 (2.3)                              | 0.3 (2.6)                           | 0.0 (2.8)                             | - 0.2 (2.6)                              |
| Median (IQR), Sum 3-hr OGTT z-scores                 | - 0.3 (2.9)                            | - 0.3 (2.9)                         | - 0.6 (3.0)                           | - 0.7 (2.6)                              |

**Table S2 (Continued):** Prenatal and Baseline Characteristics of Women with GDM by Lactation

Intensity Groups at 6-9 weeks postpartum (Study baseline).

| <b>Characteristics</b>                              | <b>Exclusive<br/>Formula<br/>n=153</b> | <b>Mostly<br/>Formula<br/>n=214</b> | <b>Mostly<br/>Lactation<br/>n=387</b> | <b>Exclusive<br/>Lactation<br/>n=205</b> |
|-----------------------------------------------------|----------------------------------------|-------------------------------------|---------------------------------------|------------------------------------------|
| <b>Prenatal characteristics</b>                     |                                        |                                     |                                       |                                          |
| Mean (SD), Gestational age at GDM diagnosis (weeks) | 24.9 (7.8)                             | 24.9 (7.2)                          | 25.4 (6.9)                            | 26.4 (6.5)                               |
| Treatment of GDM, N (%) †                           |                                        |                                     |                                       |                                          |
| Diet modification only                              | 108 (70.6)                             | 141 (65.9)                          | 263 (68.0)                            | 143 (69.8)                               |
| Oral hypoglycemic agents                            | 43 (28.1)                              | 65 (30.4)                           | 105 (27.1)                            | 57 (27.8)                                |
| Insulin                                             | 2 (1.3)                                | 8 (3.7)                             | 19 (4.9)                              | 5 (2.4)                                  |
| <b>Hospital Labor and delivery</b>                  |                                        |                                     |                                       |                                          |
| Mean (SD), Length of gestation (weeks)**            | 39.0 (1.1)                             | 39.3 (1.1)                          | 38.9 (1.2)                            | 39.2 (1.0)                               |
| Mean (SD), Length of stay (days)***                 | 2.6 (1.1)                              | 2.8 (1.3)                           | 2.5 (1.0)                             | 2.3 (0.9)                                |
| Cesarean section, N (%)*                            | 61 (39.9)                              | 74 (34.6)                           | 113 (29.2)                            | 57 (27.8)                                |

Chi-squared test for categorical variables; T-test or ANOVA for continuous variables. Kruskal-Wallis Test to compare medians. † Fisher exact test for cell sizes <5. Two-sided P values.



**Table S2 (Continued):** Prenatal and Baseline Characteristics of Women with GDM by Lactation Intensity Groups at 6-9 weeks Postpartum (Study baseline).

| <b>Characteristics</b>                      | <b>Exclusive<br/>Formula<br/>n=153</b> | <b>Mostly<br/>Formula<br/>n=214</b> | <b>Mostly<br/>Lactation<br/>n=387</b> | <b>Exclusive<br/>Lactation<br/>n=205</b> |
|---------------------------------------------|----------------------------------------|-------------------------------------|---------------------------------------|------------------------------------------|
| <b>6-9 weeks Postpartum (baseline)</b>      |                                        |                                     |                                       |                                          |
| Mean (SD), BMI (kg/m <sup>2</sup> )***      | 32.0 (7.7)                             | 30.6 (7.1)                          | 29.8 (6.4)                            | 28.5 (5.2)                               |
| Mean (SD), Waist Circumference (cm)***      | 93.6 (14.9)                            | 91.5 (15.8)                         | 89.1 (13.1)                           | 86.9 (11.0)                              |
| Mean (SD), Weight change post-delivery (kg) | -8.9 (4.0)                             | -8.7 (3.7)                          | -9.1 (3.6)                            | -9.5 (3.4)                               |
| Mean (SD), HOMA-IR***                       | 7.0 (4.1)                              | 6.5 (5.1)                           | 4.9 (3.2)                             | 4.3 (2.8)                                |
| Median (IQR), HOMA-IR***                    | 5.9 (4.7)                              | 5.1 (5.4)                           | 4.1 (3.5)                             | 3.5 (2.5)                                |
| Mean (SD), 2-hr 75 g OGTT Results           |                                        |                                     |                                       |                                          |
| Fasting glucose (mg/dL) ***                 | 97.8 (9.1)                             | 97.3 (10.2)                         | 93.2 (8.0)                            | 92.2 (7.9)                               |
| 2-hr post-load glucose (mg/dL) ***          | 110.6 (25.8)                           | 117.4 (27.6)                        | 113.0 (28.5)                          | 106.9 (28.4)                             |
| <b>Mean (SD), 2-hr 75 g OGTT Results</b>    |                                        |                                     |                                       |                                          |
| <b>Fasting glucose (mmol/L)***</b>          | <b>5.4 (0.5)</b>                       | <b>5.4 (0.6)</b>                    | <b>5.1 (0.4)</b>                      | <b>5.1 (0.4)</b>                         |
| <b>2-hr post-load glucose (mmol/L)***</b>   | <b>6.1 (1.4)</b>                       | <b>6.5 (1.5)</b>                    | <b>6.2 (1.6)</b>                      | <b>5.9 (1.6)</b>                         |
| Glucose Tolerance, N (%) ***                |                                        |                                     |                                       |                                          |
| Normal                                      | 89 (58.2)                              | 119 (55.6)                          | 265 (68.5)                            | 155 (75.6)                               |
| IFG only                                    | 43 (28.1)                              | 53 (24.8)                           | 53 (13.7)                             | 27 (13.2)                                |
| IGT only                                    | 9 (5.9)                                | 20 (9.3)                            | 50 (12.9)                             | 16 (7.8)                                 |
| IFG and IGT                                 | 12 (7.8)                               | 22 (10.3)                           | 19 (4.9)                              | 7 (3.4)                                  |
| Depression, N (%)                           |                                        |                                     |                                       |                                          |
| None                                        | 126 (86.3)                             | 174 (84.5)                          | 325 (86.0)                            | 176 (88.9)                               |
| Moderate or Severe                          | 20 (13.7)                              | 32 (15.5)                           | 53 (14.0)                             | 22 (11.1)                                |
| Median, (IQR) Lifestyle Behaviors           |                                        |                                     |                                       |                                          |
| Total Physical Activity (PA)*               | 46.5 (25.7)                            | 41.8 (27.3)                         | 42.8 (24.2)                           | 42.9 (22.8)                              |
| Moderate to Vigorous PA                     | 24.3 (19.4)                            | 22.0 (19.2)                         | 21.5 (16.6)                           | 20.5 (16.2)                              |
| Glycemic Index ***                          | 186.5 (133.4)                          | 223.6 (113.8)                       | 232.5 (135.4)                         | 248.9 (151.1)                            |
| Dietary fiber (g/100 Kcal)***               | 0.9 (0.4)                              | 1.0 (0.4)                           | 1.0 (0.5)                             | 1.1 (0.5)                                |
| Dietary Animal fat (% Kcal)***              | 28.4 (11.0)                            | 25.8 (11.9)                         | 24.4 (11.4)                           | 24.2 (9.9)                               |
| Contraception Methods, N (%) †              |                                        |                                     |                                       |                                          |
| Progesterone only                           | 8 (5.2)                                | 4 (1.9)                             | 10 (2.6)                              | 4 (2.0)                                  |
| Combination Oral Pills                      | 24 (15.7)                              | 20 (9.4)                            | 46 (11.9)                             | 28 (13.7)                                |
| Intrauterine Device                         | 17 (11.1)                              | 18 (8.3)                            | 41 (10.6)                             | 15 (7.3)                                 |
| None/Barrier                                | 104 (68.0)                             | 172 (80.4)                          | 290 (74.9)                            | 158 (77.0)                               |
| Subsequent Birth (1), N (%)                 | 16 (10.5)                              | 32 (15.0)                           | 44 (11.4)                             | 22 (10.7)                                |

**Table S3:** Newborn Characteristics of Infants Born to Women with GDM by Lactation Intensity Groups at 6-9 weeks Postpartum (Study baseline).

| <b>Newborn Characteristics</b>           | Exclusive<br>Formula<br>n=153 | Mostly<br>Formula<br>n=214 | Mostly<br>Lactation<br>n=387 | Exclusive<br>Lactation<br>n=205 |
|------------------------------------------|-------------------------------|----------------------------|------------------------------|---------------------------------|
| Mean (SD), Birth weight (g)*             | 3435 (478.9)                  | 3426 (495.7)               | 3355 (523.5)                 | 3470 (460.6)                    |
| Mean (SD), Length (cm)*                  | 50.5 (2.5)                    | 51.0 (2.4)                 | 50.3 (2.5)                   | 50.7 (2.4)                      |
| Mean (SD), Weight for length z-score*    | -0.2 (1.5)                    | -0.5 (1.3)                 | -0.3 (1.4)                   | -0.2 (1.3)                      |
| Median (IQR), Weight for length z-score* | -0.2 (1.8)                    | -0.5 (1.6)                 | -0.4 (1.8)                   | -0.2 (1.9)                      |
| Sex, N (%)*                              |                               |                            |                              |                                 |
| Female                                   | 76 (49.7)                     | 81 (37.8)                  | 192 (49.6)                   | 103 (50.2)                      |
| Male                                     | 77 (50.3)                     | 133 (62.2)                 | 195 (50.4)                   | 102 (49.8)                      |
| Gestational age, N (%)‡ **               |                               |                            |                              |                                 |
| 34 to <37 weeks (preterm)                | 6 (3.9)                       | 5 (2.3)                    | 29 (7.5)                     | 4 (2.0)                         |
| ≥37 weeks (term)                         | 147 (96.1)                    | 209 (97.7)                 | 358 (92.5)                   | 201 (98.0)                      |
| Birth Weight, N (%)‡ *                   |                               |                            |                              |                                 |
| 1,500 – 2,499 g                          | 3 (2.0)                       | 2 (0.9)                    | 18 (4.7)                     | 3 (1.5)                         |
| 2,500 – 2,999 g                          | 26 (17.0)                     | 38 (17.8)                  | 85 (22.0)                    | 27 (13.2)                       |
| 3,000 – 3,999 g                          | 108 (70.5)                    | 150 (70.1)                 | 241 (62.2)                   | 152 (74.1)                      |
| 4,000 g or more                          | 16 (10.5)                     | 24 (11.2)                  | 43 (11.1)                    | 23 (11.2)                       |
| Birth Size for gestational age, N (%)‡   |                               |                            |                              |                                 |
| Small (SGA)                              | 0 (0.0)                       | 7 (3.3)                    | 9 (2.3)                      | 3 (1.5)                         |
| Appropriate (AGA)                        | 119 (77.8)                    | 161 (75.2)                 | 293 (75.7)                   | 157 (76.6)                      |
| Large (LGA)                              | 34 (22.2)                     | 46 (21.5)                  | 85 (22.0)                    | 45 (22.0)                       |
| Apgar score at 5 min, N (%)‡             |                               |                            |                              |                                 |
| 6 or lower                               | 1 (0.7)                       | 4 (1.9)                    | 4 (1.0)                      | 0 (0.0)                         |
| 7 or higher                              | 149 (97.3)                    | 209 (97.6)                 | 377 (97.4)                   | 201 (98.0)                      |
| Missing                                  | 3 (2.0)                       | 1 (0.5)                    | 6 (1.6)                      | 4 (2.0)                         |
| Newborn Nursery, N (%)‡ **               |                               |                            |                              |                                 |
| NICU                                     | 10 (6.5)                      | 11 (5.1)                   | 22 (5.7)                     | 2 (1.0)                         |
| Brief/Intermediate level                 | 10 (6.5)                      | 21 (9.8)                   | 26 (6.7)                     | 4 (2.0)                         |
| Well care                                | 133 (86.9)                    | 182 (85.1)                 | 339 (87.6)                   | 199 (97.1)                      |
| Hospital stay, N (%)*                    |                               |                            |                              |                                 |
| ≥ 3 days                                 | 37 (24.2)                     | 48 (22.4)                  | 77 (19.9)                    | 27 (13.2)                       |
| < 3 days                                 | 116 (75.8)                    | 166 (77.6)                 | 310 (80.1)                   | 178 (86.8)                      |

Footnote: Chi-square test was used for categorical variables; F test was used for continuous variables. Kruskal-Wallis test for comparison of medians.

‡ Fisher's exact test for cell sizes < 5.

Two-sided P-values. Statistical significance: \*P <0.05; \*\* P<0.01; \*\*\* P<0.001

**Table S4:** Distribution of 959 SWIFT Participants (n, %) among Lactation Intensity Groups at 6-9 weeks Postpartum and Lactation Duration Groups at the End of Follow-up, (P-value <0.001).

| Lactation Intensity Groups at 6-9 weeks postpartum (baseline)            | Lactation Duration Groups |                |                 |            | Total, n (%) |
|--------------------------------------------------------------------------|---------------------------|----------------|-----------------|------------|--------------|
|                                                                          | 0 to 2 months             | >2 to 5 months | >5 to 10 months | >10 months |              |
| Exclusive Lactation                                                      | 2                         | 20             | 45              | 138        | 205          |
|                                                                          | 0.2                       | 2.1            | 4.7             | 14.4       | 21.4         |
| Mostly Lactation (≤6 oz formula Per day)                                 | 5                         | 73             | 116             | 193        | 387          |
|                                                                          | 0.5                       | 7.6            | 12.1            | 20.1       | 40.3         |
| Mostly Formula Feeding (>17 oz of formula Per day) or Inconsistent/mixed | 29                        | 97             | 47              | 41         | 214          |
|                                                                          | 3.0                       | 10.1           | 4.9             | 4.3        | 22.3         |
| Exclusive Formula Feeding                                                | 153                       | 0              | 0               | 0          | 153          |
|                                                                          | 16.0                      | 0              | 0               | 0          | 16.0         |
| <b>Overall Total, N (%)</b>                                              | 189                       | 190            | 208             | 372        | 959          |
|                                                                          | 19.7                      | 19.8           | 21.7            | 38.8       | 100          |

*Table Abbreviations:*

HOMA-IR = Homeostatic Metabolic Assessment of Insulin Resistance Index

IGT = impaired glucose tolerance

IFG = impaired fasting glucose

IQR = Interquartile range

NICU = Newborn Intensive Care Unit

OGTT = oral glucose tolerance test

PA = physical activity in met-hours per week

SD = standard deviation

Sum of 3-hr OGTT z-scores = sum of four z-scores for the prenatal 100 g OGTT glucose values (fasting, 1 hour, 2 hour and 3 hour)

AGA = Appropriate for gestational age

SGA = Small for gestational age

LGA = Large for gestational age

WIC = Special Supplemental Nutrition Program for Women, Infants and Children (eligibility based on income <185% of the federal poverty level).
